# Supplementary material for: Two Crystal Forms of a Hydrated 2:1 β-Cyclodextrin Fluconazole Complex: Single Crystal X-ray Structures, Dehydration Profiles, and Conditions for Their Individual Isolation
Source: MDPI journal article supplement (doi:10.3390/molecules26154427), 2021-07-22
Supplement: s1 [file s1]

# Two crystal forms of a hydrated 2:1 $\beta$ -cyclodextrin-fluconazole complex: single crystal X-ray structures, dehydration profiles, and conditions for their individual isolation

Andrea Sala, Zakiena Hoossen, Alessia Bacchi, and Mino R. Caira

## SUPPLEMENTARY MATERIAL

**Figure S1.**  $^1\text{H}$  NMR spectrum of the TBCDFLU complex (solvent  $\text{DMSO-d}_6$ ).

**Table S1.**  $^1\text{H}$  NMR spectral integration for the TBCDFLU complex.

**Figure S2.**  $^1\text{H}$  NMR spectrum of the MBCDFLU complex (solvent  $\text{DMSO-d}_6$ ).

**Table S2.**  $^1\text{H}$  NMR spectral integration for the MBCDFLU complex.

**Figure S3.** HSM micrographs showing the behavior of hydrated  $\beta$ -CD-FLU complexes on heating under silicone oil at  $10\text{ K min}^{-1}$ .

**Figure S4.** Magnified views of selected TGA curves for the dehydration of TBCDFLU and MBCDFLU.

**Figure S5.** Perspective view of the host molecules A and B in TBCDFLU (H atoms omitted for clarity) showing the labeling of the glucose residues.

**Table S3.** Geometrical parameters of the host molecules (A, B) in TBCDFLU.

**Figure S6.** Atomic numbering of the fluconazole molecule in the MBCDFLU crystal (left) and a general view of the two disordered guest components (right).

**Figure S7.** Atomic numbering of the glucose residues in the  $\beta$ -CD molecule of MBCDFLU.

**Table S4.** Geometrical parameters of the host molecule MBCDFLU.

**Figure S8.** Relative dehydration rates of single crystals of TBCDFLU (T) and MBCDFLU (M), with times in seconds indicated on the micrographs.

**Figure S9.** FTIR spectra for (top) the host ( $\beta$ -CD), the guest (fluconazole), and the co-precipitated product TBCDFLU, and (bottom) the co-precipitated product MBCDFLU.

**Figure S10.** Experimental and calculated PXRD patterns for TBCDFLU and MBCDFLU.

**Table S5.** Experimental conditions for the preparation of crystal forms TBCDFLU and MBCDFLU.

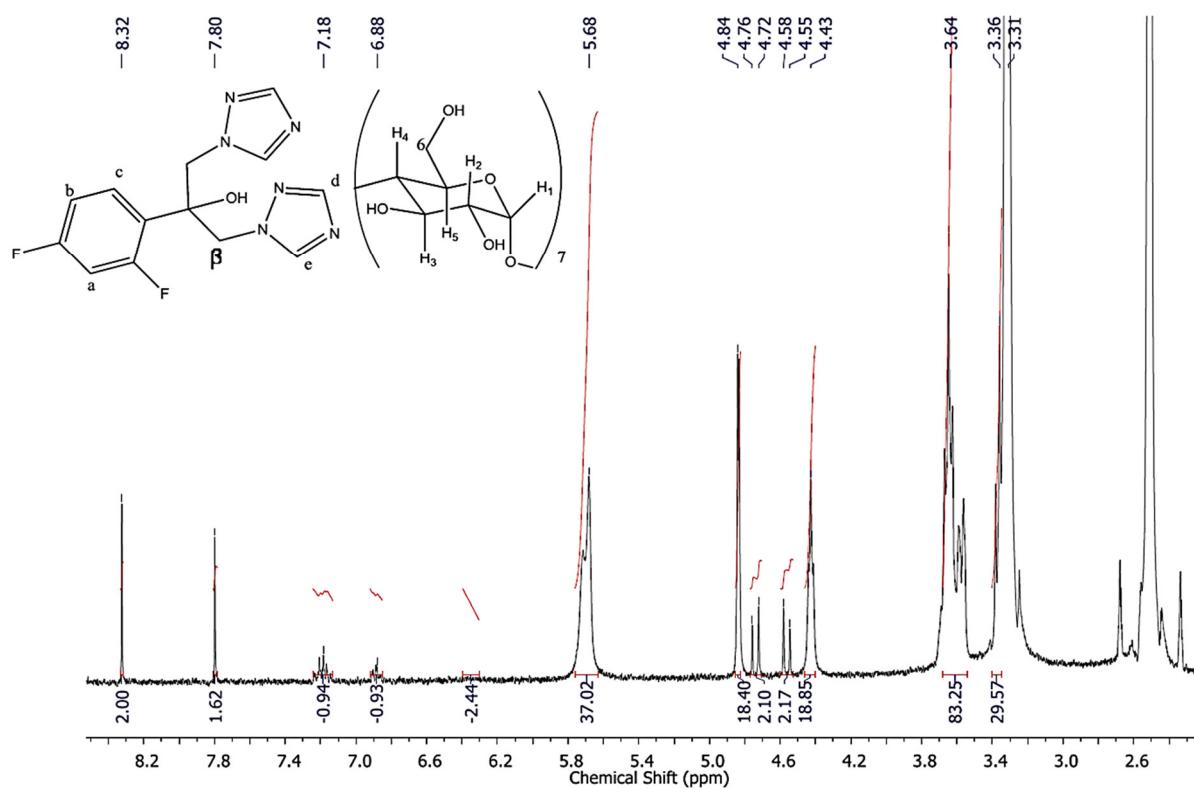

**Figure S1.**  $^1\text{H}$  NMR spectrum of the TBCDFLU complex (solvent  $\text{DMSO-d}_6$ ).

**Table S1.**  $^1\text{H}$  NMR spectral integration for the TBCDFLU complex.

| Proton                                | $\delta(\text{ppm})$ | Multiplicity | J(Hz) | Int   | Experimental/<br>theoretical |
|---------------------------------------|----------------------|--------------|-------|-------|------------------------------|
| C-H <sub>e</sub>                      | 8.33                 | s            |       | *2.00 | 1.00                         |
| C-H <sub>d</sub>                      | 7.80                 | s            |       | 1.62  | 0.81                         |
| C-H <sub>b</sub>                      | 6.88                 | m            |       | 0.93  | 0.93                         |
| C-OH <sub>2</sub> & C-OH <sub>3</sub> | 5.72 & 5.69          | 2×s          |       | 37.02 | 1.32                         |
| C-H <sub>1</sub>                      | 4.84                 | s            |       | 18.40 | 1.31                         |
| C-H <sub><math>\beta</math>1</sub>    | 4.72                 | d            | 14.6  | 2.10  | 1.05                         |
| C-H <sub><math>\beta</math>2</sub>    | 4.54                 | d            | 14.3  | 2.17  | 1.09                         |
| C-OH <sub>6</sub>                     | 4.43                 | s            |       | 18.85 | 1.35                         |

\*Reference integral

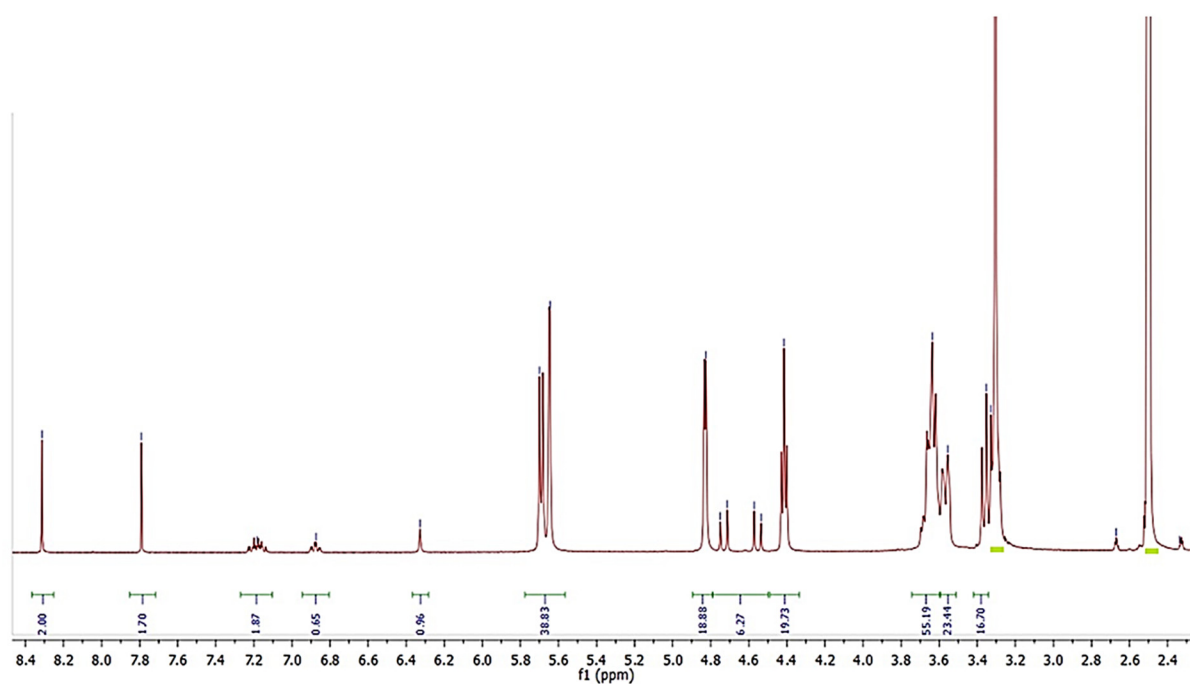

**Figure S2.**  $^1\text{H}$  NMR spectrum of the MBCDFLU complex (solvent  $\text{DMSO-d}_6$ ).

**Table S2.**  $^1\text{H}$  NMR spectral integration for the MBCDFLU complex.

| Proton                                                                 | $\delta$ (ppm) | Multiplicity | J/Hz     | Int   | Experimental/<br>theoretical |
|------------------------------------------------------------------------|----------------|--------------|----------|-------|------------------------------|
| C-H <sub>e</sub>                                                       | 8.31-8.32      | s            |          | *2.00 | 1.00                         |
| C-H <sub>d</sub>                                                       | 7.79           | s            |          | 1.70  | 0.85                         |
| C-H <sub>b,c</sub>                                                     | 7.12-7.24      | m            |          | 1.87  | 0.96                         |
| C-H <sub>a</sub>                                                       | 6.84-6.92      | d of t       | 1.8, 6   | 0.65  | 0.65                         |
| O-H <sub>d</sub>                                                       | 6.32-6.33      | s            |          | 0.96  | 0.96                         |
| C-OH <sub>2</sub> & C-OH <sub>3</sub>                                  | 5.58-5.74      | d x 2        | 5.1, 1.8 | 38.83 | 1.39                         |
| C-H <sub>1</sub>                                                       | 4.79-4.87      | d            | 2.7      | 18.88 | 1.34                         |
| C-H <sub><math>\beta</math>1</sub> & CH <sub><math>\beta</math>2</sub> | 4.50-4.78      | q            | 12, 54   | 6.27  | 1.56                         |
| C-OH <sub>6</sub>                                                      | 4.35-4.46      | s            |          | 19.73 | 1.57                         |

\*Reference integral

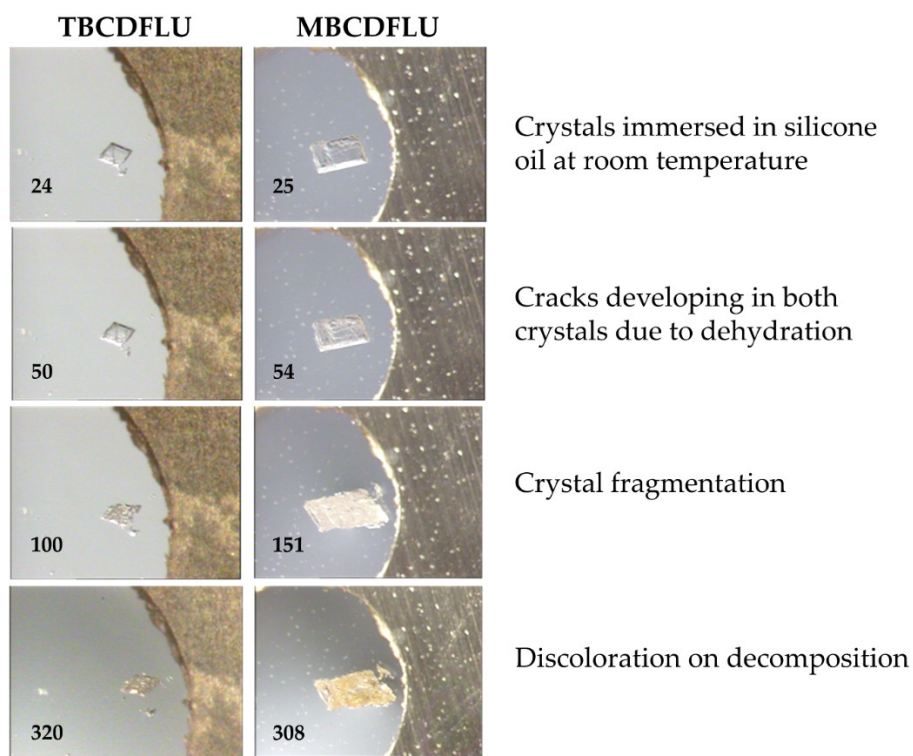

**Figure S3.** HSM micrographs showing the behavior of hydrated  $\beta$ -CD·FLU complexes on heating under silicone oil at 10 K min<sup>-1</sup>.

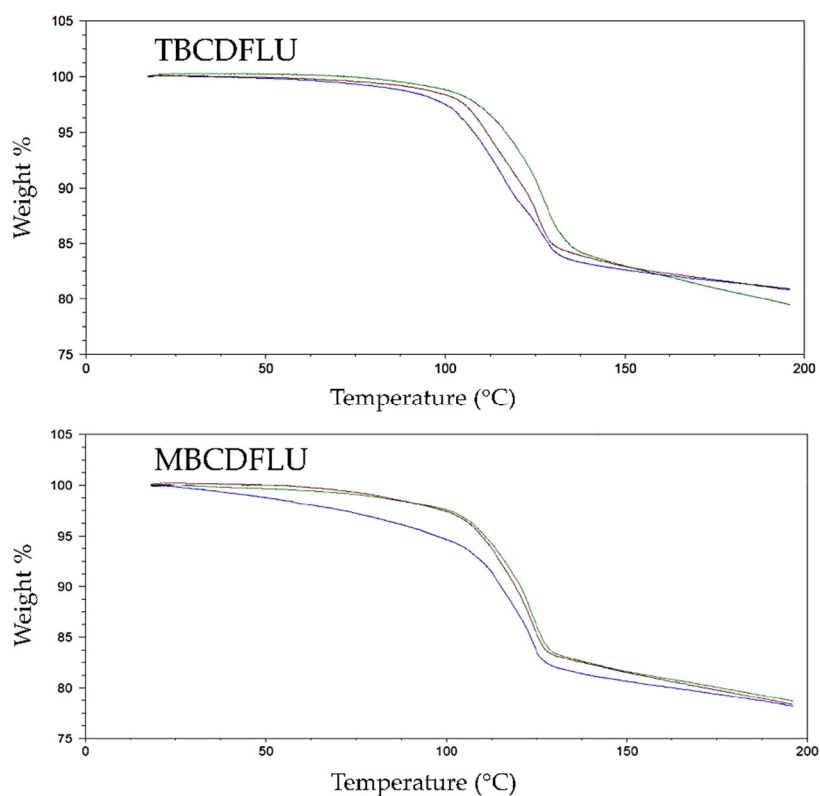

**Figure S4.** Magnified views of selected TGA curves for the dehydration of TBCDFLU and MBCDFLU.

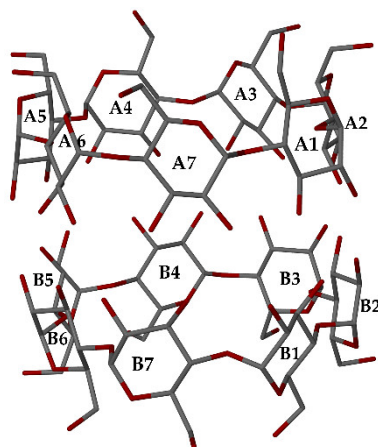

**Figure S5.** Perspective view of the host molecules A and B in TBCDFLU (H atoms omitted for clarity) showing the labeling of the glucose residues. (Geometrical data tabulated below).

**Table S3.** Geometrical parameters of the host molecules (A, B) in TBCDFLU.

| Residue | $l$ (Å) | $D$ (Å) | $\Phi$ (°) | $d$  | $\alpha^a$ (Å) | $D_3^b$ (Å) | $\tau_2^c$ (°) |
|---------|---------|---------|------------|------|----------------|-------------|----------------|
| A1      | 5.012   | 4.533   | 132.8      | -0.4 | 0.015          | 2.85        | 8.9            |
| A2      | 4.821   | 4.288   | 126.8      | -0.3 | 0.007          | 2.79        | 4.6            |
| A3      | 5.121   | 4.418   | 124.8      | 1.6  | -0.013         | 2.85        | 6.8            |
| A4      | 5.226   | 4.247   | 130.7      | -1.9 | -0.011         | 2.85        | 11.7           |
| A5      | 4.904   | 4.560   | 134.1      | 0.5  | 0.030          | 2.81        | 9.5            |
| A6      | 4.847   | 4.303   | 120.5      | 0.5  | -0.017         | 2.70        | 13.7           |
| A7      | 5.352   | 4.293   | 130.2      | -0.3 | -0.011         | 2.81        | 7.7            |
| B1      | 5.025   | 4.392   | 130.1      | -0.9 | 0.000          | 2.87        | 13.8           |
| B2      | 4.900   | 4.404   | 129.8      | -0.3 | 0.014          | 2.71        | 4.4            |
| B3      | 5.007   | 4.381   | 123.2      | 2.2  | -0.014         | 2.76        | 8.5            |
| B4      | 5.239   | 4.203   | 132.1      | -3.0 | -0.013         | 2.79        | 8.4            |
| B5      | 4.899   | 4.570   | 131.0      | 1.9  | 0.037          | 2.83        | 8.7            |
| B6      | 4.903   | 4.263   | 124.1      | -0.9 | -0.029         | 2.83        | 14.8           |
| B7      | 5.211   | 4.319   | 129.6      | 0.9  | 0.006          | 2.80        | 6.3            |

<sup>a</sup> mean e.s.d. 0.004 Å; <sup>b</sup> mean e.s.d. 0.01 Å; <sup>c</sup> mean e.s.d. 0.2°

#### PARAMETER DEFINITIONS

$l$ : distance between each glycosidic O4 atom and the centroid of the O4-heptagon.

$D$ : glycosidic O4 $n$ ...O4( $n+1$ ) distance.

$\Phi$ : O4( $n-1$ )...O4 $n$ ...O4( $n+1$ ) angle.

$d$ : O4( $n-1$ )...O4 $n$ ...O4( $n+1$ )...O4( $n+2$ ) torsion angle.

$\alpha$ : deviation of atoms O4 $n$  from the least-squares plane through the O4-heptagon.

$D_3$ : inter-ring hydrogen bond O(2 $n$ )...O(3 $n-1$ ) distances.

$\tau_2$ : tilt angle (between O4 $n$ -C1 $n$ ...C4 $n$ -O4( $n+1$ ) mean plane and that of the O4-heptagon).

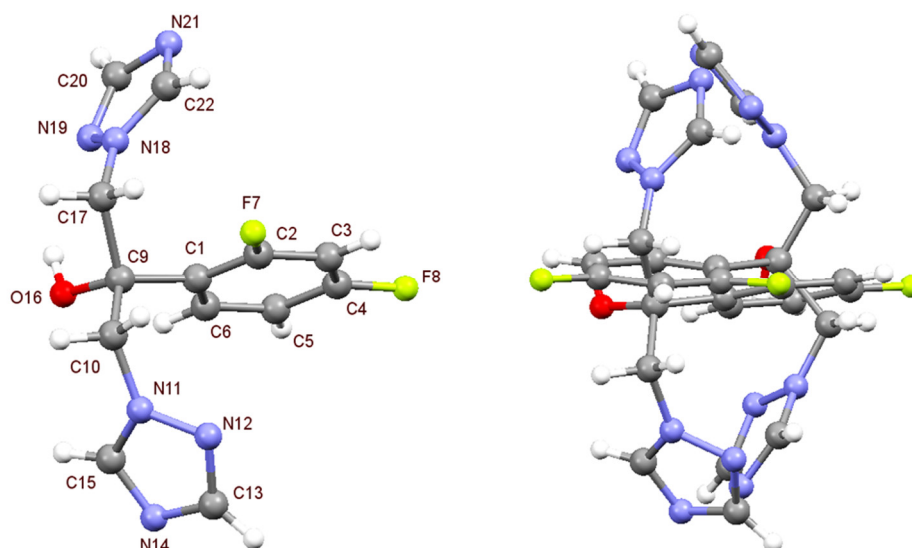

**Figure S6.** Atomic numbering of the fluconazole molecule in the MBCDFLU crystal (left) and a general view of the two disordered guest components (right).

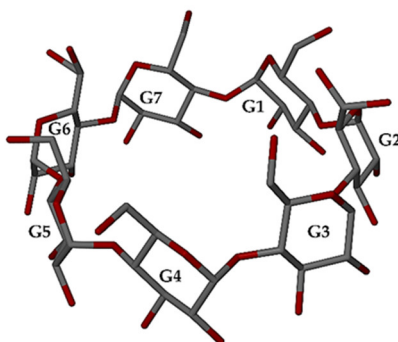

**Figure S7.** Atomic numbering of the glucose residues in the β-CD molecule of MBCDFLU. (Geometrical data tabulated below).

**Table S4.** Geometrical parameters of the host molecule MBCDFLU.

| Residue | $l$ (Å) | $D$ (Å) | $\Phi$ (°) | $d$ (°) | $\alpha^a$ (Å) | $D_3^b$ (Å) | $\tau_2^c$ (°) |
|---------|---------|---------|------------|---------|----------------|-------------|----------------|
| G1      | 4.878   | 4.381   | 130.6      | -3.4    | -0.071         | 2.830       | 11.3           |
| G2      | 5.097   | 4.311   | 127.8      | 1.7     | -0.041         | 2.788       | 13.1           |
| G3      | 5.194   | 4.275   | 124.5      | 4.5     | 0.090          | 2.801       | 10.3           |
| G4      | 4.833   | 4.534   | 130.4      | -5.6    | 0.011          | 2.786       | 2.5            |
| G5      | 4.951   | 4.294   | 130.4      | 0.4     | -0.115         | 2.763       | 10.6           |
| G6      | 5.292   | 4.337   | 122.1      | 3.6     | 0.062          | 2.787       | 14.4           |
| G7      | 4.956   | 4.436   | 131.3      | -0.7    | 0.064          | 2.961       | 9.3            |

<sup>a</sup> mean e.s.d. 0.004 Å; <sup>b</sup> mean e.s.d. 0.008 Å; <sup>c</sup> mean e.s.d. 0.2°

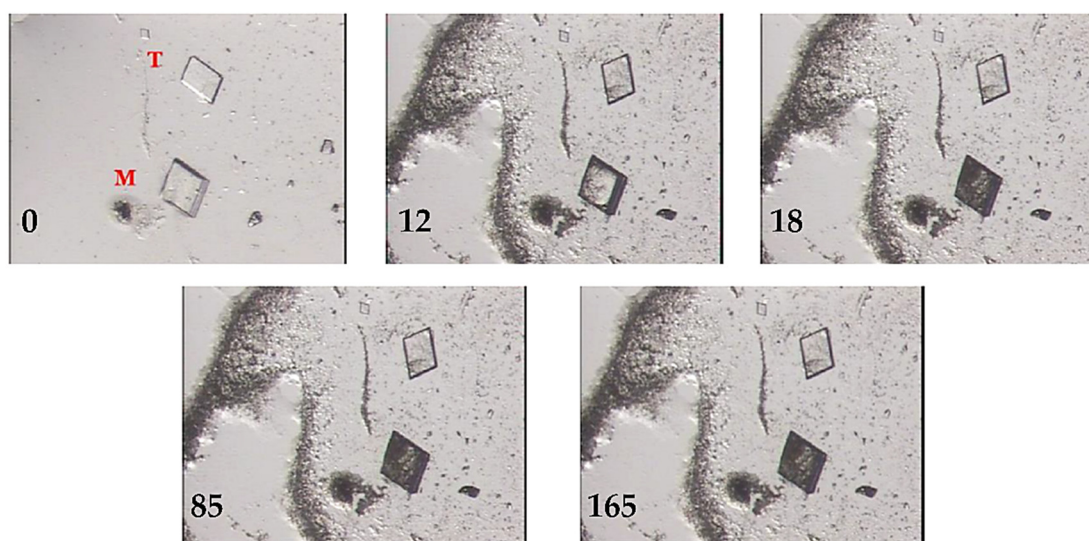

**Figure S8.** Relative dehydration rates of single crystals of TBCDFLU (T) and MBCDFLU (M), with times in seconds indicated on the micrographs.

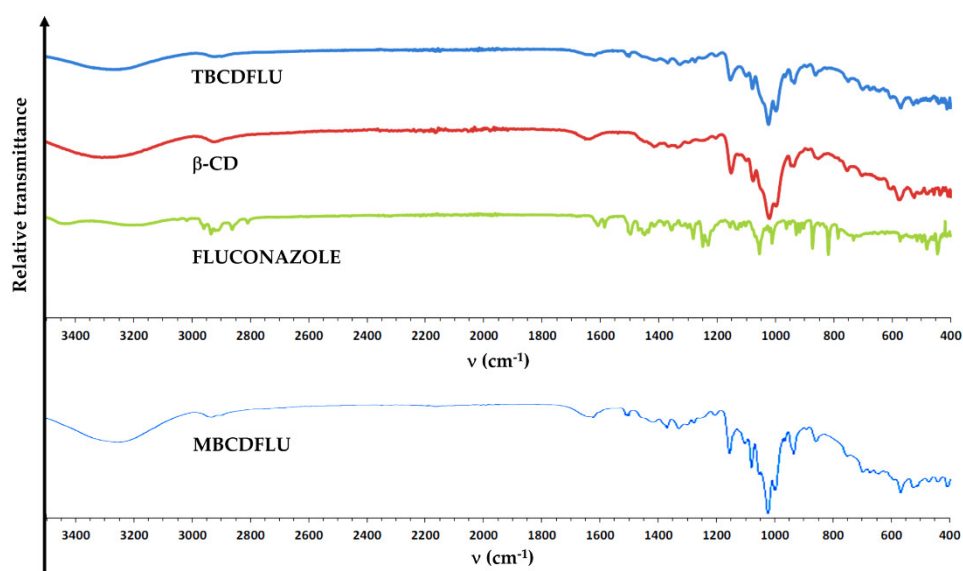

**Figure S9.** FTIR spectra for (top) the host ( $\beta$ -CD), the guest (fluconazole), and the co-precipitated product TBCDFLU, and (bottom) the co-precipitated product MBCDFLU.



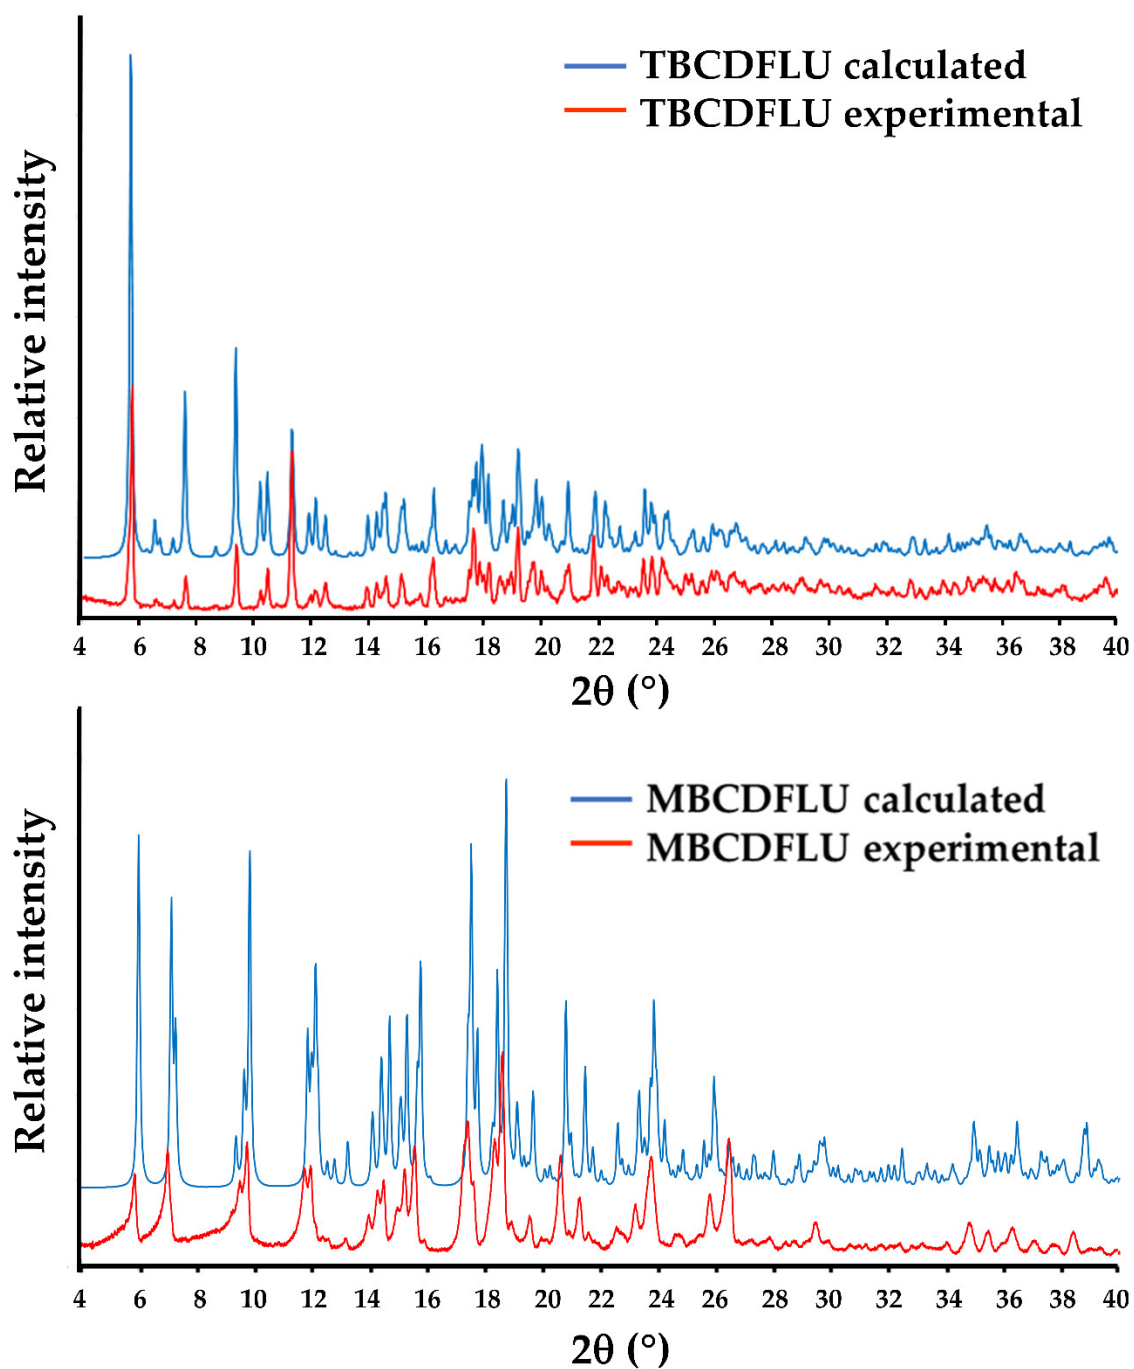

**Figure S10.** Experimental and calculated PXRD patterns for TBCDFLU and MBCDFLU. The shifts of the majority of the peaks in the calculated pattern of MBCDFLU to slightly higher  $2\theta$ -positions in the figure are due to the large difference in the temperatures of the recording of the experimental pattern (294 K) and the calculated pattern based on the single-crystal X-ray analysis (100 K).



**Table S5.** Experimental conditions for the preparation of crystal forms TBCDFLU and MBCDFLU.

| <u>Name</u> | <u>V H<sub>2</sub>O</u><br><u>(ml)</u> | <u>mg</u><br><u>Fluconazole</u> | <u>mg β-CD</u> | <u>Concentration</u><br><u>(M)</u> | <u>Incubation T.</u> | <u>Crystals</u> | <u>Type of</u><br><u>form</u> |
|-------------|----------------------------------------|---------------------------------|----------------|------------------------------------|----------------------|-----------------|-------------------------------|
| 50-4 AS     | 0.5                                    | 5                               | 37             | $6.52 \times 10^{-2}$              | 60 °C                | ✓               | <b>M</b>                      |
| SET No. 1   | 0.5                                    | 4                               | 29.6           | $5.21 \times 10^{-2}$              | 60 °C                | ✓               | <b>M + T</b>                  |
|             | 0.5                                    | 3                               | 22.2           | $3.91 \times 10^{-2}$              | 60 °C                | ✓               | <b>M + T</b>                  |
|             | 0.5                                    | 2                               | 14.8           | $2.61 \times 10^{-2}$              | 60 °C                | ✓               | <b>M + T</b>                  |
|             | 0.5                                    | 1                               | 7.4            | $1.3 \times 10^{-2}$               | 60 °C                | ✓               | <b>T</b>                      |
|             | 0.5                                    | 0.5                             | 3.7            | $6.52 \times 10^{-3}$              | 60 °C                | ×               | ×                             |
| 50-10 AS    | 0.5                                    | 5                               | 37             | $6.52 \times 10^{-2}$              | 45 °C                | ✓               | <b>T</b>                      |
| SET No.2    | 0.5                                    | 4                               | 29.6           | $5.21 \times 10^{-2}$              | 45 °C                | ✓               | <b>M + T</b>                  |
|             | 0.5                                    | 3                               | 22.2           | $3.91 \times 10^{-2}$              | 45 °C                | ✓               | <b>T</b>                      |
|             | 0.5                                    | 2                               | 14.8           | $2.61 \times 10^{-2}$              | 45 °C                | ✓               | <b>T</b>                      |
|             | 0.5                                    | 1                               | 7.4            | $1.3 \times 10^{-2}$               | 45 °C                | ✓               | <b>T</b>                      |
|             | 0.5                                    | 0.5                             | 3.7            | $6.52 \times 10^{-3}$              | 45 °C                | ×               | ×                             |

\*The designations 50-4 AS and 50-10-AS are in-house code names for the specific conditions for isolating the individual monoclinic (M) and triclinic (T) crystals.
